# Supplementary material for: Day-Level Mediators of Change in Brief Motivational Intervention for Alcohol Use and Liver Health
Source: Research Square preprint supplement (doi:10.21203/rs.3.rs-9943945/v1), 2026-06-10
Supplement: Supplementary file 1 [file 221ea47e02ed67652864b2fa.docx]

**Supplementary File B**

***Model Diagnostics and Sensitivity Analyses***

Two sensitivity analyses assessed the robustness of the focal indirect-effect inference. Section B.1 reports leave-one-participant-out (LOO) sensitivity analyses for the four indirect effects through within-person importance of limiting drinking; Section B.2 reports profile-likelihood confidence intervals for the a-path intervention coefficients.

**B.1. Leave-one-participant-out (LOO) sensitivity for the indirect effects**

To assess whether the indirect-effect inference for within-person importance of limiting drinking was disproportionately influenced by any single participant, each a-path and b-path model was refit 33 times, dropping one participant in turn (Nieuwenhuis et al., 2012). For each LOO fit, the point indirect effect was computed as the product of the a-path intervention coefficient (from the lme4 model on importance) and the b-path within-person importance coefficient (from the glmmTMB model on the outcome). Results are presented in Table S3. All 33 LOO fits converged for every outcome (no convergence failures). The LOO range of point indirect estimates was contained well within the full-sample 95% Monte Carlo confidence interval for every outcome, and the LOO median was nearly identical to the full-sample point estimate in all four cases (differences ranging from 0.001 to 0.003). No single participant was responsible for the significance of any indirect-effect estimate.

**Table S3**

*Leave-One-Participant-Out (LOO) Sensitivity for Indirect Effects via Within-Person Importance of Limiting Drinking*

| Outcome | Full-sample indirect | Full-sample 95% MC CI | LOO fits (n) | LOO min | LOO median | LOO max |
| --- | --- | --- | --- | --- | --- | --- |
| Drinks per day | −0.064 | [−0.138, −0.011] | 33 | −0.081 | −0.065 | −0.049 |
| Any drinking | −0.132 | [−0.282, −0.023] | 33 | −0.181 | −0.134 | −0.095 |
| Heavy drinking day | −0.181 | [−0.430, −0.012] | 33 | −0.242 | −0.179 | −0.137 |
| Planned drinks | −0.136 | [−0.260, −0.029] | 33 | −0.164 | −0.139 | −0.096 |

*Note*. Indirect effects on the link (log/logit) scale, computed as the product of the a-path intervention coefficient and the b-path within-person importance coefficient. MC = Monte Carlo (20,000 simulation draws). LOO = leave-one-participant-out. The LOO range is the minimum and maximum point indirect-effect estimate across the 33 fits; the LOO median is the median across fits.

**B.2. Profile-likelihood vs. Wald confidence intervals for a-path intervention coefficients**

At small Level-2 sample sizes, Wald confidence intervals for fixed effects in mixed-effects models can be anti-conservative because they assume the log-likelihood is locally quadratic near the maximum-likelihood estimate (Bates et al., 2015b; Bolker et al., 2009). To assess the robustness of the Wald inference reported in the main manuscript, profile-likelihood confidence intervals were computed for the intervention coefficient in both a-path models (importance, confidence). As every indirect effect in the manuscript depends on the a-path estimate, the a-path is the coefficient most consequential for the mediation inference. Wald CIs for the b-path within-person mediator coefficients were not reanalyzed via profile likelihood, as the b-path inference was far from the conventional significance threshold (seven of eight at p ≤ .001, with the importance b-path for heavy drinking day at p = .018) and is therefore not vulnerable to small differences in CI method.

Results are presented in Table S4. The Wald and profile-likelihood CIs were essentially identical for both a-path intervention coefficients, agreeing to within 0.003 units on both bounds. The significant Wald inference for the importance a-path (b = 0.73, 95% CI [0.17, 1.29]) was confirmed by profile likelihood (95% CI [0.17, 1.29]); the non-significant Wald inference for the confidence a-path (b = 0.27, 95% CI [−0.35, 0.89]) was similarly confirmed (profile CI [−0.35, 0.89]). The small-sample concern with Wald inference was therefore not realized in these data, and the substantive conclusions about the a-paths are robust to the choice of confidence-interval method.

**Table S4**

*Profile-Likelihood vs. Wald Confidence Intervals for the A-Path Intervention Coefficient*

| Model | Estimate (b) | Wald 95% CI | Profile-likelihood 95% CI |
| --- | --- | --- | --- |
| A-path: Importance | 0.73 | [0.17, 1.29] | [0.17, 1.29] |
| A-path: Confidence | 0.27 | [−0.35, 0.89] | [−0.35, 0.89] |

*Note*. Wald CIs were computed as *b* ± 1.96 × *SE*; profile-likelihood CIs were computed by inverting the likelihood-ratio test as implemented in the lme4 package (Bates et al., 2015b).
