# Supplementary material for: Day-Level Mediators of Change in Brief Motivational Intervention for Alcohol Use and Liver Health
Source: Research Square preprint supplement (doi:10.21203/rs.3.rs-9943945/v1), 2026-06-10
Supplement: Supplementary file 2 [file 2c46b54f696bc3d0f19b3ee1.docx]

**Supplementary File A**

***Random-Effects Structure Selection***

All multilevel models reported in the main manuscript included a random intercept for participant. To determine whether random-slope terms should additionally be retained, each random-intercept-only specification was compared to a parsimonious random-slope specification using a likelihood-ratio test (LRT) on the maximum-likelihood deviance. For total-effect and a-path models, the candidate random slope was placed on the post-intervention linear time variable (*t2*); for b-path models, two uncorrelated within-person random slopes for importance and confidence components were tested jointly. The uncorrelated parsimonious syntax was used throughout to preserve identifiability given the Level-2 sample size of N = 33 participants (Bates et al., 2015a; Matuschek et al., 2017). Models with significant LRTs (*p* < .05) supported the random-slope specification; for the one outcome where the LRT was non-significant, the random-slope structure was nonetheless retained for consistency across outcomes, after confirming that fixed-effect estimates were essentially unchanged.

Table S1 presents the LRT results for all 10 model comparisons. Across the four total-effect models, a random slope on *t2* was supported for planned drinks (*χ*²(1) = 5.22, *p* = .022) but not for drinks per day, any drinking, or heavy drinking day (all *p* ≥ .647). Random slopes on *t2* were strongly supported for both a-path models (importance: *χ*²(1) = 77.86, *p* < .001; confidence: *χ*²(1) = 39.88, *p* < .001). For the b-path models, joint random slopes on the within-person mediator components were supported for three of four outcomes (drinks per day: *χ*²(2) = 14.87, *p* < .001; heavy drinking day: *χ*²(2) = 8.55, *p* = .014; planned drinks: *χ*²(2) = 35.46, *p* < .001). For any drinking, the LRT was non-significant (*χ*²(2) = 2.04, *p* = .360); the random-slope structure was nonetheless retained, and the within- and between-person mediator coefficients differed by no more than ~8% on the link scale, with substantive inference (sign, significance) unchanged.

**Table S1**

*Random-Effects Structure Selection via Likelihood-Ratio Tests Comparing Random-Intercept-Only to Random-Slope Specifications*

| Model | Random slope tested | df | χ² | p |
| --- | --- | --- | --- | --- |
| *Total-effect models* |
| Drinks per day | Post-intervention slope (*t2*) | 1 | 0.00 | 1.00 |
| Any drinking | Post-intervention slope (*t2*) | 1 | 0.21 | .647 |
| Heavy drinking day | Post-intervention slope (*t2*) | 1 | 0.00 | 1.00 |
| Planned drinks | Post-intervention slope (*t2*) | 1 | 5.22 | .022 |
| *A-path models* |
| Importance | Post-intervention slope (*t2*) | 1 | 77.86 | < .001 |
| Confidence | Post-intervention slope (*t2*) | 1 | 39.88 | < .001 |
| *B-path models* |
| Drinks per day | WP importance and confidence | 2 | 14.87 | < .001 |
| Any drinking | WP importance and confidence | 2 | 2.04 | .360 |
| Heavy drinking day | WP importance and confidence | 2 | 8.55 | .014 |
| Planned drinks | WP importance and confidence | 2 | 35.46 | < .001 |

*Note*. For b-path models, the two random slopes were tested jointly against a random-intercept-only baseline.

**Variance components of the retained random-slope specifications**

Estimated standard deviations (SDs) of the random effects from the retained random slope specifications are summarized in Table S2. Random-intercept SDs were substantial across all models, consistent with meaningful between-person variability in baseline levels of drinking, importance, and confidence. Random-slope SDs for the within-person mediator components in the b-path models were small but non-zero, indicating modest heterogeneity in the strength of the within-person mediator–outcome associations across participants.

**Table S2**

*Variance Components (SDs) of the Retained Random-Slope Specifications*

| Model | Random intercept SD | Random slope SD (*t2*) | Random slope SD (WP importance) | Random slope SD (WP confidence) |
| --- | --- | --- | --- | --- |
| *Total-effect* |
| Planned drinks | 0.92 | 0.05 | — | — |
| *A-paths* |
| Importance | 2.79 | 0.15 | — | — |
| Confidence | 2.56 | 0.12 | — | — |
| *B-paths* |
| Drinks per day | 0.63 | — | 0.05 | 0.10 |
| Any drinking | 1.25 | — | < 0.01 | 0.14 |
| Heavy drinking day | 1.46 | — | 0.33 | < 0.01 |
| Planned drinks | 0.80 | — | 0.09 | 0.14 |

*Note*. SDs are reported on the link scale (log for negative binomial models, logit for Bernoulli models, identity for Gaussian models). The Gaussian a-path models also estimated a residual SD of 1.99 (importance) and 2.19 (confidence). "—" indicates that the random slope was not part of the model specification for the corresponding model. For the heavy drinking day b-path, the random slope on WP confidence was estimated near zero.

In summary, the random-slope specifications adopted as primary in the main manuscript were supported by likelihood-ratio testing for nine of the ten model comparisons. For the single non-significant comparison (the any-drinking b-path), the random-slope structure was retained to ensure that all four b-path models shared a common random-effects specification, and the substantive conclusions were robust to this choice. The uncorrelated parsimonious random-effects syntax (Bates et al., 2015a) avoided the over-parameterization risk associated with the maximal random-effects structure given the small Level-2 sample size (Matuschek et al., 2017).
